# Supplementary material for: LINC00680 and TTN-AS1 Stabilized by EIF4A3 Promoted Malignant Biological Behaviors of Glioblastoma Cells
Source: PubMed Central journal article supplement — Mol Ther Nucleic Acids. 2019 Nov 16;19:905–21. doi: 10.1016/j.omtn.2019.10.043 (PMC7063483; doi:10.1016/j.omtn.2019.10.043), 2019-11-16
Supplement: mmc1.pdf [file mmc1.pdf]

OMTN, Volume 19

## **Supplemental Information**

**LINC00680 and TTN-AS1 Stabilized by EIF4A3**

**Promoted Malignant Biological Behaviors**

**of Glioblastoma Cells**

**Wei Tang, Di Wang, Lianqi Shao, Xiaobai Liu, Jian Zheng, Yixue Xue, Xuelei Ruan, Chunqing Yang, Libo Liu, Jun Ma, Zhen Li, and Yunhui Liu**

A

**RNA Binding Protein Information**

(1) binding site **HPAM7\_2664**  
 Name: HPAM7\_2664  
 Target Location: chr5:5827119-5827119[-]  
 RBP Name: eIF4A3  
 Target Name: LINC00580  
 Target Transcripts: ENST00000418765 ENST00000450081 ENST00000418368 ENST00000392751 ENST00000422882  
 ClipSeq ReadNum: 1000

(2) binding site **HPAM1\_4903**  
 Name: HPAM1\_4903  
 Target Location: chr5:5827112-5827116[-]  
 RBP Name: eIF4A3  
 Target Name: LINC00580  
 Target Transcripts: ENST00000418765 ENST00000450081 ENST00000418368 ENST00000392751 ENST00000422882  
 ClipSeq ReadNum: 1000

B

**RNA Binding Protein Information**

(1) binding site **HEAM1\_17956**  
 Name: HEAM1\_17956  
 Target Location: chr21:17963884-17963892[+]  
 RBP Name: eIF4A3  
 Target Name: ITIH3-AS1  
 Target Transcripts: ENST00000419746 ENST00000582434  
 ClipSeq ReadNum: 1000

(2) binding site **HEAW7\_10281**  
 Name: HEAW7\_10281  
 Target Location: chr21:17963857-17963973[+]  
 RBP Name: eIF4A3  
 Target Name: ITIH3-AS1  
 Target Transcripts: ENST00000419746 ENST00000582434  
 ClipSeq ReadNum: 1000

C

**miRSeq Details**

Name: hsa-miR-320b  
 Sequence: aaaaaguggagpagaagcaaa  
 MiBase ID: MIMAT0005792 CP  
 Related Diseases: CP

| Binding Category                                                                                     | Transcript Position | Binding Score | Conservation |
|------------------------------------------------------------------------------------------------------|---------------------|---------------|--------------|
| 7mer                                                                                                 | 148-187             | 0.083         | 1            |
| Position on chromosome: 6:57946230-57946249                                                          |                     |               |              |
| Conserved Species: panTro2                                                                           |                     |               |              |
| Binding area:                                                                                        |                     |               |              |
| <pre> AAGACACA G A UAAA A G CUUU CA CAGCUUU           C GGAG GU GUGGAAA A G A UGG A           </pre> |                     |               |              |
| 8mer                                                                                                 | 1760-1778           | 0.058         | 1            |
| Position on chromosome: 6:57949536-57949555                                                          |                     |               |              |
| Conserved Species: panTro2                                                                           |                     |               |              |
| Binding area:                                                                                        |                     |               |              |
| <pre> AACAUAGA GUUC CUC CAA UUCACGUUU           GAG GUU GGUUCGAAA G A           </pre>               |                     |               |              |

D

**miRSeq Details**

Name: hsa-miR-320b  
 Sequence: aaaaaguggagpagaagcaaa  
 MiBase ID: MIMAT0005792 CP  
 Related Diseases: CP

| Binding Category                                                                                                       | Transcript Position | Binding Score | Conservation |
|------------------------------------------------------------------------------------------------------------------------|---------------------|---------------|--------------|
| 7mer                                                                                                                   | 4017-4043           | 0.083         | 13           |
| Position on chromosome: 2:17860428-17860486                                                                            |                     |               |              |
| Conserved Species: panTro2,meMac2,mkOryCui2,boiTau4,canFam2,danNov2,lovAtr3,echTel1,monDom5,xenTro2,darRer6            |                     |               |              |
| Binding area:                                                                                                          |                     |               |              |
| <pre> A G AGUAGCAAG A CCC U UCA AUUCAUCUUU           GGG A AGU UGGUCGAAA C G           </pre>                          |                     |               |              |
| 8mer                                                                                                                   | 2340-2364           | 0.020         | 14           |
| Position on chromosome: 2:178583151-178583176                                                                          |                     |               |              |
| Conserved Species: panTro2,meMac2,mkOryCui2,boiTau4,canFam2,danNov2,lovAtr3,echTel1,monDom5,gaiGal3,xenTro2,h2,darRer6 |                     |               |              |
| Binding area:                                                                                                          |                     |               |              |
| <pre> CA AAG ACAUAGU C UCC CAG UCCAGCUGU           GGG GUU GGUUCGAAA C AGA A           </pre>                          |                     |               |              |

E

| Position                          | 3' UTR                                                        | Predicted consequential pairing of target region (top) and miRNA (bottom) | Site type |
|-----------------------------------|---------------------------------------------------------------|---------------------------------------------------------------------------|-----------|
| Position 2320-2327 of EGR3 3' UTR | 5' ...AUUUUAGGCGUUAACAGCUUUA...<br>3' ...AGGAGAGUGGZUCGAAAA   |                                                                           | 8mer      |
| Position 2320-2327 of EGR3 3' UTR | 5' ...AUUUUAGGCGUUAACAGCUUUA...<br>3' ...AACGGAGAGUGGCGGCAAAA |                                                                           | 8mer      |
| Position 2320-2327 of EGR3 3' UTR | 5' ...AUUUUAGGCGUUAACAGCUUUA...<br>3' ...DGGAGAGUGGCGGCAAAA   |                                                                           | 8mer      |
| Position 2320-2327 of EGR3 3' UTR | 5' ...AUUUUAGGCGUUAACAGCUUUA...<br>3' ...AACGGAGAGUGGCGGCAAAA |                                                                           | 8mer      |
| Position 2320-2327 of EGR3 3' UTR | 5' ...AUUUUAGGCGUUAACAGCUUUA...<br>3' ...AACGGAGAGUGGCGGCAAAA |                                                                           | 8mer      |

F

Filter:

| Matrix ID                         | Name | Score   | Relative score | Sequence ID           | Start | End  | Strand |
|-----------------------------------|------|---------|----------------|-----------------------|-------|------|--------|
| MA0732.1                          | EGR3 | 9.96211 | 0.84653990368  | NG_009000.1:2000-5000 | 2711  | 2725 | -      |
| Predicted sequence CTCTGCCACGCCCC |      |         |                |                       |       |      |        |
| MA0732.1                          | EGR3 | 7.63063 | 0.816920692577 | NG_009000.1:2000-5000 | 2266  | 2280 | -      |
| Predicted sequence ACACCCACACAGA  |      |         |                |                       |       |      |        |

Showing 1 to 2 of 2 entries

Previous 1 Next

G Fold change: 1.872  
P-value: 5.97E-9

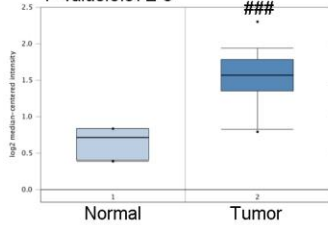

H Fold change: 4.490  
P-value: 1.46E-7

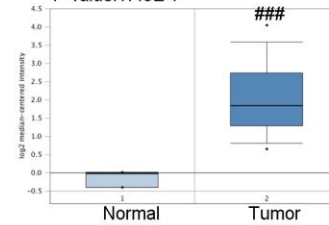

I

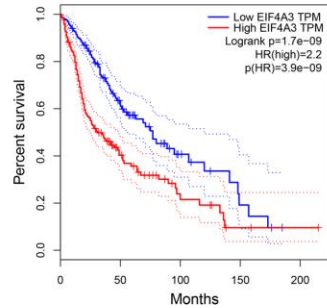

J

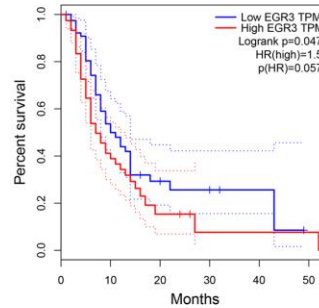

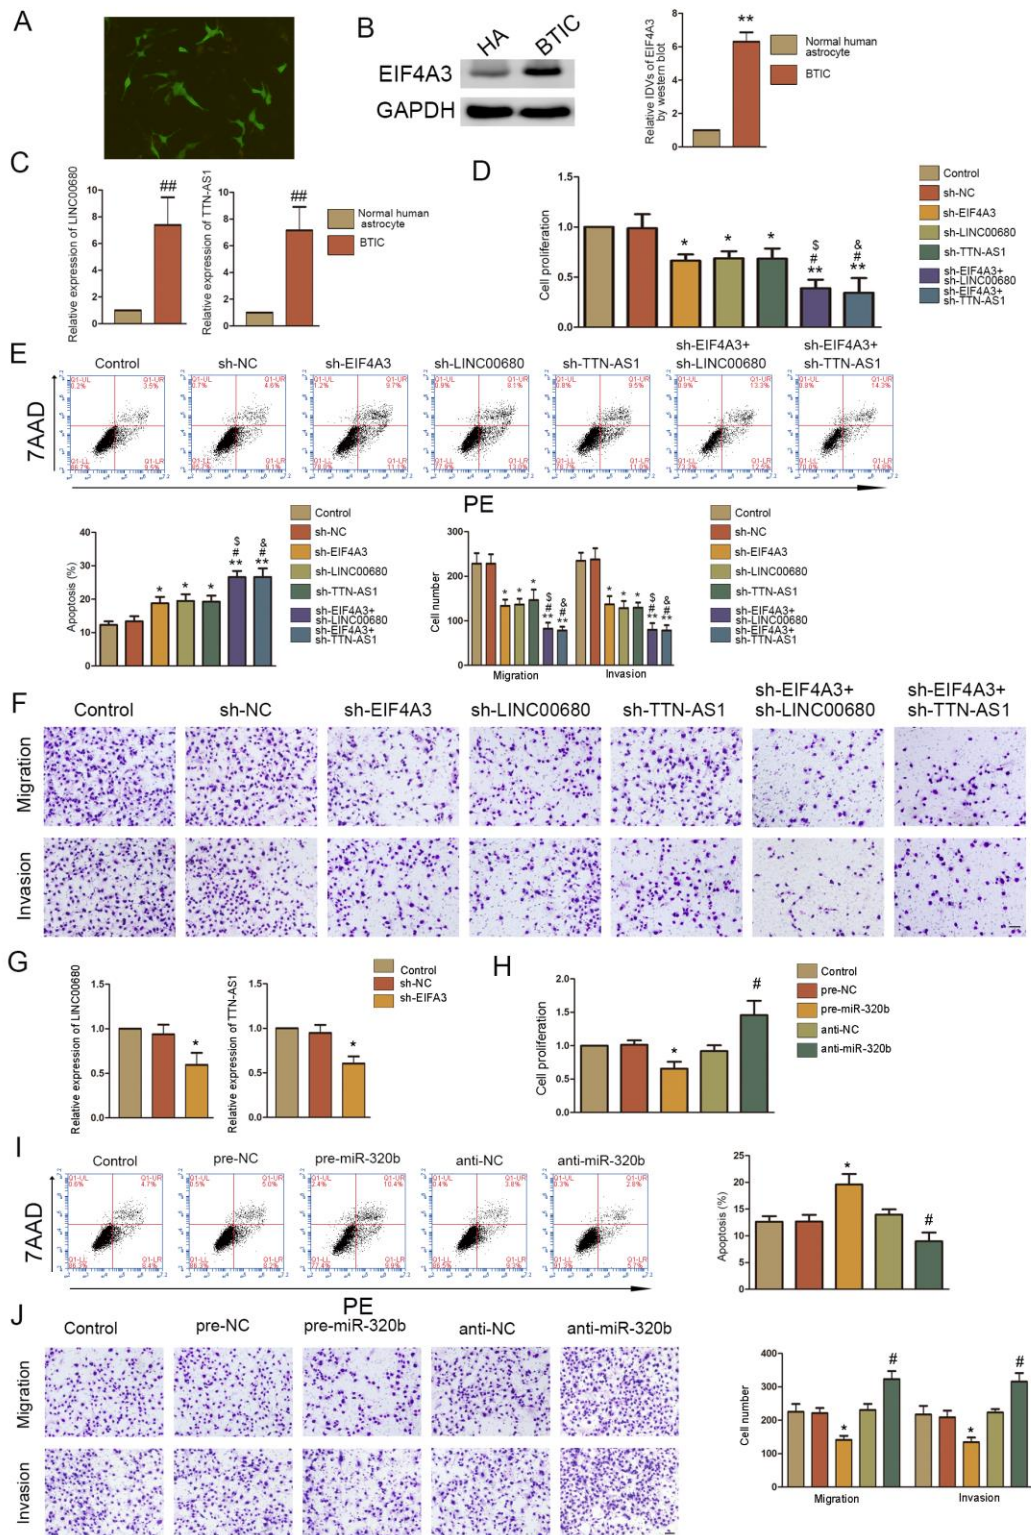

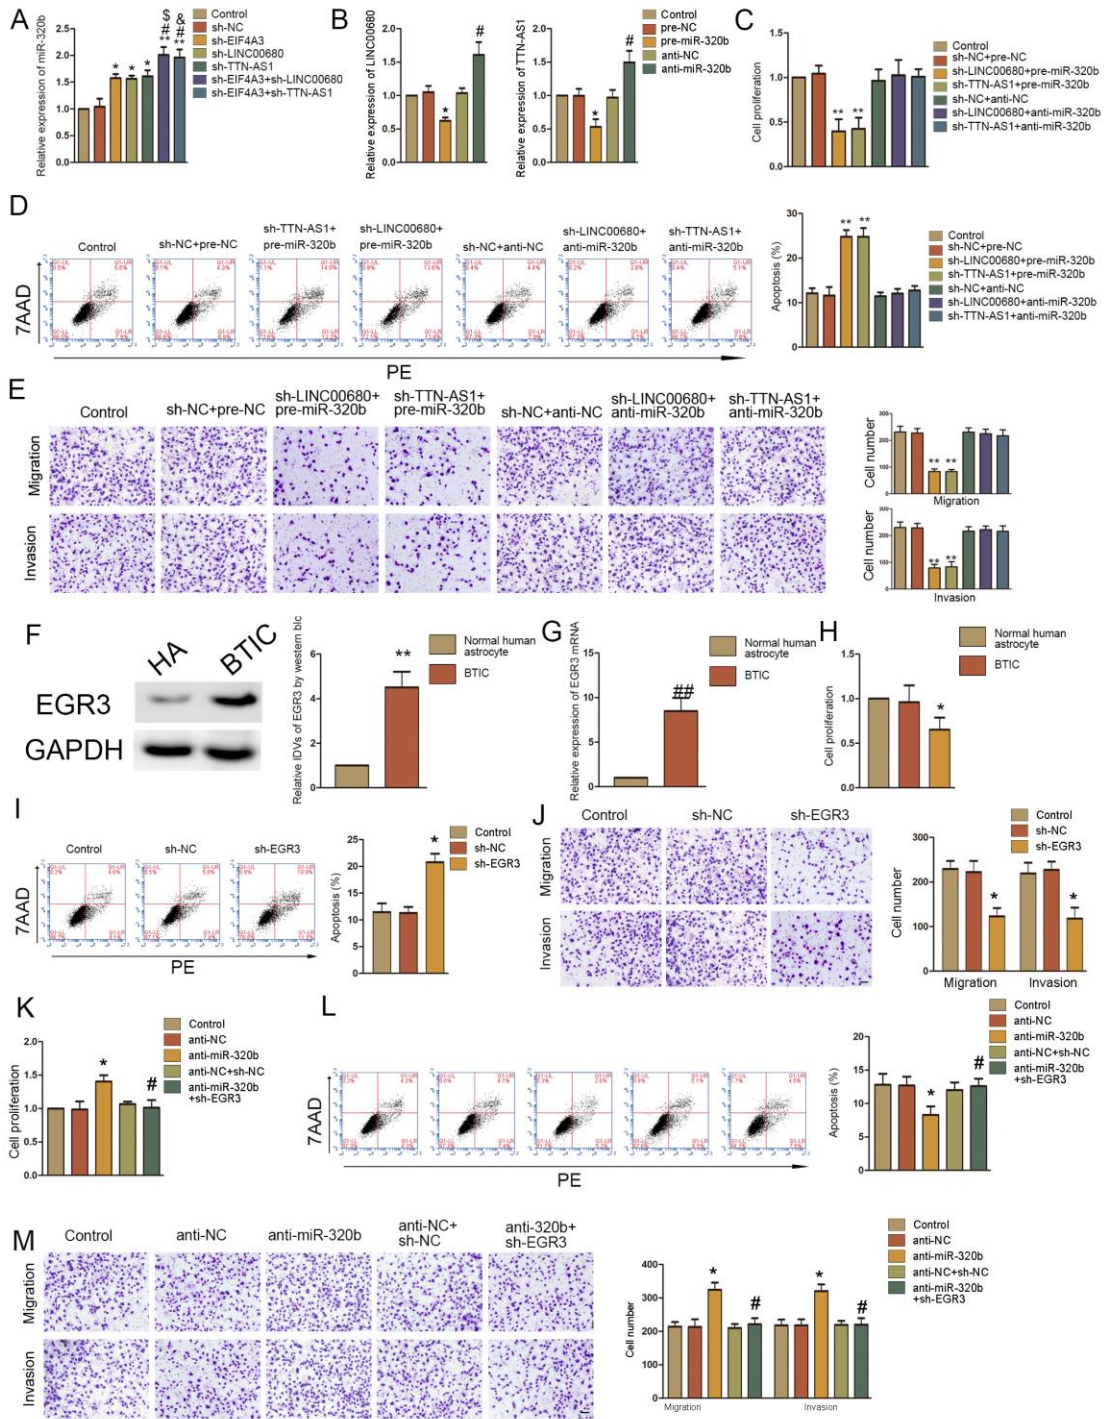

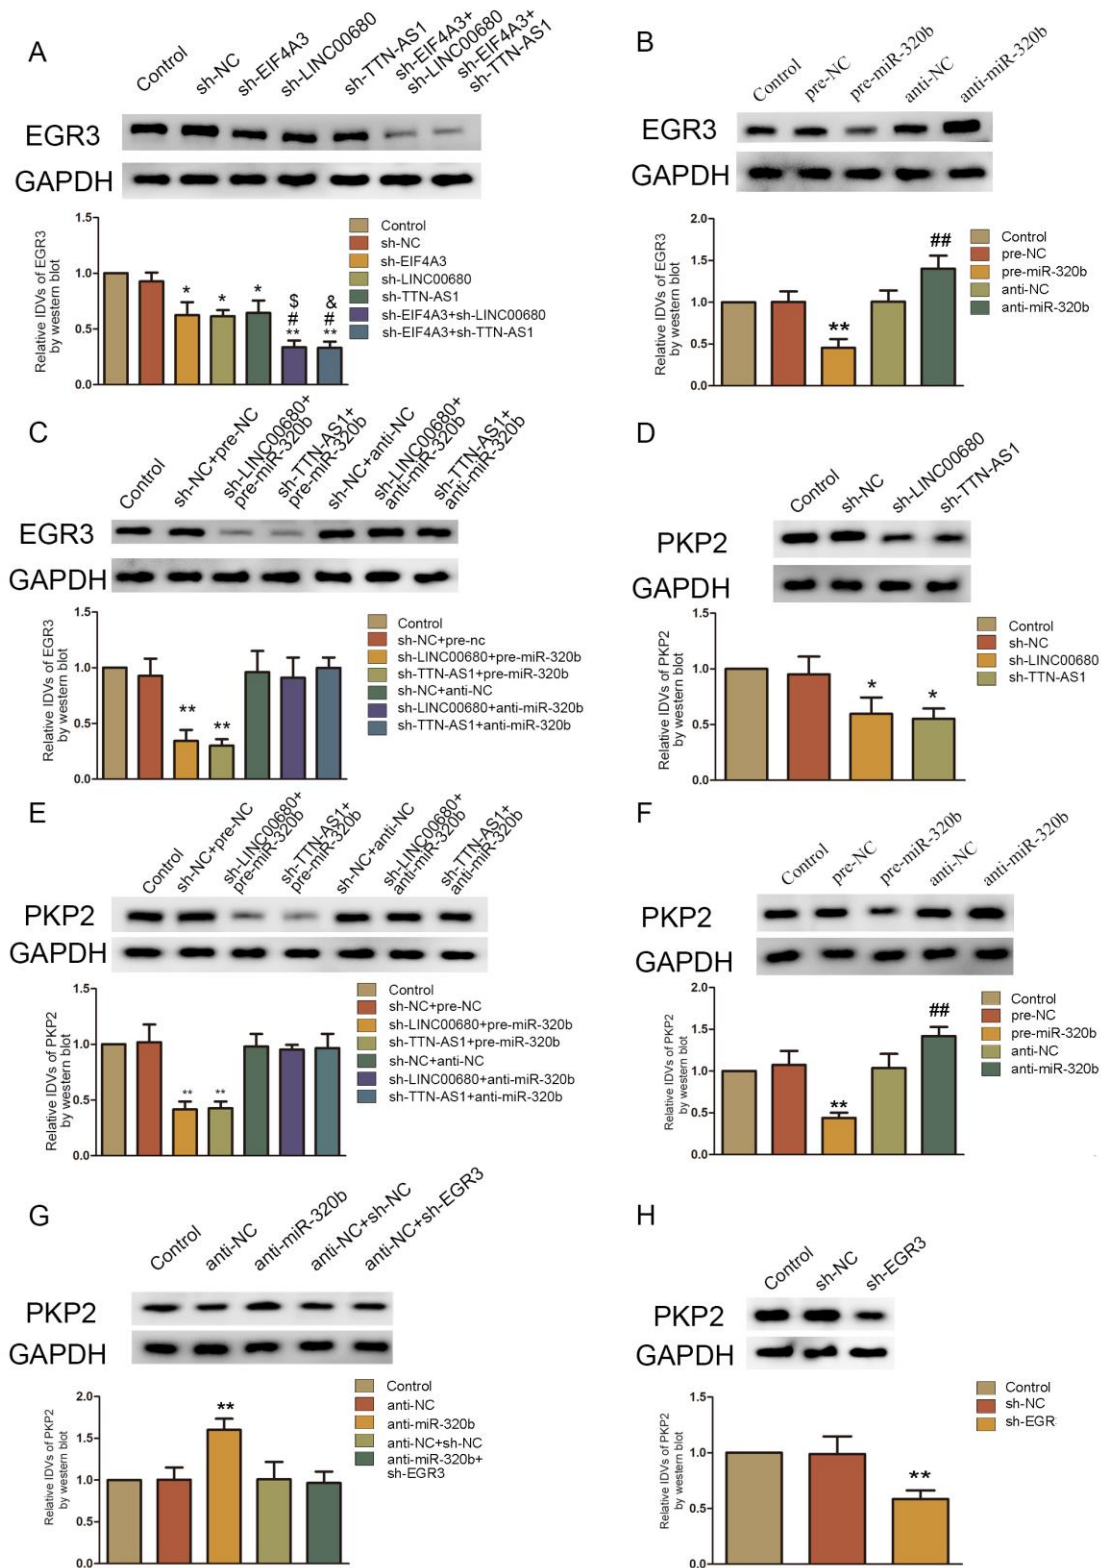

**Supplemental figure 1. Results of the in-silico experiments and expression and survival of EIF4A3 and EGR3 from databases**

A. Putative binding sites of EIF4A3 and LINC00680 from Database: Starbase V2.0

(<http://starbase.sysu.edu.cn/starbase2/>). B. Putative binding sites of EIF4A3 and TTN-AS1 from Database: Starbase V2.0 (<http://starbase.sysu.edu.cn/starbase2/>). C. Putative binding sites of LINC00680 and miR-320b from Database: LncBase (<http://diana.imis.athena-innovation.gr/DianaTools/index.php?r=lncBase/index>). D. Putative binding sites of TTN-AS1 and miR-320b from Database: LncBase (<http://diana.imis.athena-innovation.gr/DianaTools/index.php?r=lncBase/index>). E. Putative binding sites of miR-320b and EGR3 mRNA from Database: TargetScan ([http://www.targetscan.org/vert\\_72/](http://www.targetscan.org/vert_72/)). F. Putative binding sites of EGR3 and PKP2 promotor from Database: Jaspar (<http://jaspar.genereg.net/>). G. Expression of EIF4A3 from database Database: Oncomine (<https://www.oncomine.org/resource/main.html>), ###p<0.001 versus normal brain tissue. H. Expression of EGR3 from database Database: Oncomine, ###p<0.001 versus normal brain tissue. I. Survival data of EIF4A3 from Database: GEPIA (<http://gepia.cancer-pku.cn/detail.php>). J. Survival data of EGR3 from Database: GEPIA.

## **Supplemental figure 2. Results of experiments using BTICs**

A. GFAP staining by Immunofluorescence. Secondary antibody was labeled with FITC. Green fluorescence demonstrated GFAP in BTICs. B. Expression of EIF4A3 determined by western blot. \*\*p < 0.01 versus normal human astrocytes (HA). C. Expression of LINC00680 and TTN-AS1 determined by PCR (n=3). ##p < 0.01 versus HA. D. CCK-8 assay was conducted to investigate the effect of EIF4A3, LINC00680 and TTN-AS1 on proliferation in BTICs. \*p < 0.05 versus sh-NC group (empty vector);

\*\*p < 0.01 versus sh-NC group; #p < 0.05 versus sh-EIF4A3 group; \$p < 0.05 versus sh-LINCC0680 group, &p < 0.05 versus sh-TTN-AS1 group. E. Flow cytometry analysis of EIF4A3, LINC00680 and TTN-AS1 knockdown in BTICs. \*p < 0.05 versus sh-NC group (empty vector); \*\*p < 0.01 versus sh-NC group; #p < 0.05 versus sh-EIF4A3 group; \$p < 0.05 versus sh-LINCC0680 group, &p < 0.05 versus sh-TTN-AS1 group. F. Transwell assays were used to measure the effect of EIF4A3, LINC00680 and TTN-AS1 on cell migration and invasion in BTICs. Representative images and statistical plots were presented. \*p < 0.05 versus sh-NC group (empty vector); \*\*p < 0.01 versus sh-NC group; #p < 0.05 versus sh-EIF4A3 group; \$p < 0.05 versus sh-LINCC0680 group, &p < 0.05 versus sh-TTN-AS1 group. Scale bars represent 80  $\mu$ m. G. Expression of LINC00680(left) and TTN-AS1(right) were detected in BTICs with EIF4A3 knockdown by PCR. \*p < 0.05 versus sh-NC group. H. CCK-8 assay was conducted to investigate the effect of miR-320b on proliferation in BTICs. \*p < 0.05 versus pre-NC group, #p<0.05 versus anti-NC group. I. Flow cytometry analysis effect of miR-320b on apoptosis in BTICs. \*p < 0.05 versus pre-NC group, #p<0.05 versus anti-NC group. J. Transwell assays were used to measure the effect of miR-320b on cell migration and invasion in BTICs. Representative images and statistical plots were presented. \*p < 0.05 versus pre-NC group, #p<0.05 versus anti-NC group. Scale bars represent 80  $\mu$ m. Data are presented as the mean  $\pm$  SD (n = 3 in each group).

### **Supplemental figure 3. Results of experiments using BTICs**

A. Real-time PCR analysis for EIF4A3, LINC00680 and TTN-AS1 regulating miR-320b expression in BTICs. \*p < 0.05 versus sh-NC group; \*\*p < 0.01 versus sh-NC

group; #p < 0.05 versus sh-EIF4A3 group; \$p < 0.05 versus sh-LINCC0680 group, &p < 0.05 versus sh-TTN-AS1 group. B. Real-time PCR analysis for miR-320b modulating LINCC0680 and TTN-AS1 expression in BTICs. \*p < 0.05 versus pre-NC group, #p < 0.05 versus anti-NC group. C. CCK-8 assay was conducted to investigate the effect of LINCC0680/TTN-AS1 and miR-320b on proliferation in BTICs. \*\*p < 0.01 versus sh-NC+ pre-NC group. D. Flow cytometry analysis of LINCC0680/TTN-AS1 and miR-320b in BTICs. \*\*p < 0.01 versus sh-NC+ pre-NC group. E. Transwell assays were used to measure the effect of LINCC0680/TTN-AS1 and miR-320b on cell migration and invasion in BTICs. Representative images and statistical plots were presented. \*\*p < 0.01 versus sh-NC+ pre-NC group. Scale bars represent 80  $\mu$ m. Data are presented as the mean  $\pm$  SD (n = 3). F. Western blot was used to detect expression of EGR3 in BTICs. G. Expression of EGR3 mRNA in BTICs was detected by Real-time PCR. H. CCK-8 assay was conducted to investigate the effect of EGR3 on proliferation in BTICs. \*p < 0.05 versus sh-NC group. I. Flow cytometry analysis of EGR3 in BTICs. \*p < 0.05 versus sh-NC group. J. Transwell assays were used to measure the effect of EGR3 on cell migration and invasion in BTICs. Representative images and statistical plots were presented. Data are presented as the mean  $\pm$  SD (n = 3 in each group). \*p < 0.05 versus sh-NC group. Scale bars represent 80  $\mu$ m. Data are presented as the mean  $\pm$  SD (n = 3). K. CCK-8 assays were performed in BTICs with the altered expression of miR-320b and EGR3. \*p < 0.01 versus anti-NC group; #p < 0.05 versus anti-miR-320b group. L. Flow cytometry analysis of BTICs with the altered expression of miR-320b and EGR3. \*p < 0.05 versus anti-NC group; #p < 0.05 versus anti-miR-320b group. M.



Quantification number of migration and invasion cells treated with anti-miR-320b and sh-EGR3. Representative images and statistical plots were presented. Scale bars represent 80  $\mu\text{m}$ . \* $p < 0.05$  versus anti-NC group; # $p < 0.05$  versus anti-miR-320b group. Data are presented as the mean  $\pm$  SD (n = 3).

#### **Supplemental figure 4. Results of experiments using BTICs**

A. Expression of EGR3 was regulated in BTICs lines with knockdown of EIF4A3 and/or LINC00680/TTN-AS1. \* $p < 0.05$  versus sh-NC group; \*\* $p < 0.01$  versus sh-NC group; # $p < 0.05$  versus sh-EIF4A3 group; \$ $p < 0.05$  versus sh-LINCC0680 group, & $p < 0.05$  versus sh-TTN-AS1 group. B. Expression of EGR3 was regulated in BTICs lines with knockdown or over-expression of miR-320b. \*\* $p < 0.01$  versus pre-NC group, ## $p < 0.01$  versus anti-NC group. C. Expression of EGR3 was regulated by LINC00680/TTN-AS1 and miR-320b. \*\* $p < 0.01$  versus sh-NC+ pre-NC group. Data are presented as the mean  $\pm$  SD (n = 3). D. Western blot analysis of PKP2 in BTICs knockdown of LINC00680 or TTN-AS1. Data are presented as the mean  $\pm$  SD (n = 3 in each group). \* $p < 0.05$  versus sh-NC group. E. Western blot analysis of PKP2 in BTICs regulated by LINC00680/TTN-AS1 and miR-320b. \*\* $p < 0.01$  versus sh-NC+ pre-NC group. F. Western blot analysis of PKP2 in BTICs regulated by miR-320b. \*\* $p < 0.01$  versus pre-NC group, ## $p < 0.01$  versus anti-NC group. G. Western blot analysis of PKP2 in BTICs regulated by miR-320b and EGR3. \*\* $p < 0.01$  versus anti-NC group; ## $p < 0.05$  versus anti-miR-320b group. H. Western blot analysis of PKP2 in BTICs regulated by EGR3. \*\* $p < 0.01$  versus sh-NC group. Data are presented as the mean  $\pm$  SD (n = 3).

Table S1. Primers used for RT-qPCR.

|           |                |                                 |
|-----------|----------------|---------------------------------|
| EIF4A3    | Forward primer | 5'-GATGCCGATGAACGTTGCTG-3'      |
|           | Reverse primer | 5'-GGTGGTGGCACCTTAGAAGTAT-3'    |
| LINC00680 | Forward primer | 5'-CCATCGACTGGCTCATCACAA-3'     |
|           | Reverse primer | 5'-GGGGCAAGGCAAATCAATACC -3'    |
| TTN-AS1   | Forward primer | 5'-ACACTCATCATCCAGCCTGC-3'      |
|           | Reverse primer | 5'-TGGCCATCATTGCAAGCTAAC-3'     |
| miR-320b  | Forward primer | 5'-AATTAATCCCTCTCTTTCTAGTTCT-3' |
|           | Reverse primer | 5'-AGTTAATTTGTTTGCCCTCTCAA-3'   |
| EGR3      | Forward primer | 5'-GGTGACCATGAGCAGTTTGC-3'      |
|           | Reverse primer | 5'-TAGGTCACGGTCTTGTTGCC-3'      |

Table S2. Sequences for sh-RNA, agomir and antagomir

|                    |                                |
|--------------------|--------------------------------|
| sh-EIF4A3          | 5'-GGATATTCAGGTTTCGTGAAAC-3'   |
| sh-LINC00680       | 5'-GCACTTGAAGAGAGGTTTACC-3'    |
| sh-TTN-AS1         | 5'-GCAATGATGGGCCACTAAATTG-3'   |
| sh-EGR3            | 5'-CTAAACCAACTGCCTGACAAT-3'    |
| miR-320b agomir    | 5'- AAAGCUGGGUUGAGAGGG CAA -3' |
| miR-320b antagomir | 5'- UUGCCCUCUCAACCCAGCUUUU-3'  |

Table S3. Primers used for ChIP experiments

| Binding site or Control |                | Sequence                      | Product size (bp) | Annealing temperature (°C) |
|-------------------------|----------------|-------------------------------|-------------------|----------------------------|
| PCR1                    | Forward primer | 5'-GTGACTCTCGAGGGCTCACC-3'    | 192               | 60.8                       |
|                         | Reverse primer | 5'-CGGCCTTCCCTGAGGAGG-3'      |                   |                            |
| PCR2                    | Forward primer | 5'-GCAGTGGCTCACGCCTGTAATC-3'  | 261               | 61.2                       |
|                         | Reverse primer | 5'-GAGTGCAGTGGTGTGATCTCAGC-3' |                   |                            |
